# Supplementary material for: Associations of the gut microbiome and inflammatory markers with mental health symptoms: a cross-sectional study on Danish adolescents
Source: Springer Nature journal article supplement (doi:10.1038/s41598-025-94687-7), 2025-03-26

## Supplementary Materials

Supplementary Table S1: Descriptive Characteristics and Probabilities (p) After T-Test (continuous) or Chi-square (categorical) of Study Participants Stratified by ASRS+/-

| Demographics                                          | ASRS+            | ASRS-          | p-value |
|-------------------------------------------------------|------------------|----------------|---------|
| <b>n</b>                                              | <b>67</b>        | <b>278</b>     |         |
| <b>Male: N (%)</b>                                    | 25 ( 37.3)       | 145 ( 52.2)    | 0.041   |
| <b>Gestational Age in Days: mean (SD)</b>             | 281.10<br>(9.35) | 280.91 (10.08) | 0.888   |
| <b>Delivery Mode</b>                                  |                  |                | 0.337   |
| <b>Acute C-Section: N (%)</b>                         | 5 ( 7.5)         | 39 ( 14.0)     |         |
| <b>Natural Birth: N (%)</b>                           | 57 ( 85.1)       | 217 ( 78.1)    |         |
| <b>Planned C-Section: N (%)</b>                       | 5 ( 7.5)         | 22 ( 7.9)      |         |
| <b>Mother's Age at 2 Years in Years: mean (SD)</b>    | 32.94 (4.65)     | 31.92 (4.55)   | 0.112   |
| <b>Antibiotics in First 3 Years: N(%)</b>             | 58 ( 86.6)       | 245 ( 88.1)    | 0.886   |
| <b>Social Circumstances*: mean (SD)</b>               | 0.02 (0.94)      | 0.03 (1.03)    | 0.974   |
| <b>Living with Parents: N(%)</b>                      | 62 ( 92.5)       | 260 ( 93.5)    | 0.985   |
| <b>Urban Household: N(%)</b>                          | 33 ( 51.6)       | 107 ( 41.6)    | 0.196   |
| <b>Has a Cat or Dog: N(%)</b>                         | 45 ( 67.2)       | 207 ( 74.5)    | 0.292   |
| <b>BMI: mean (SD)</b>                                 | 23.97 (4.43)     | 22.79 (4.01)   | 0.035   |
| <b>Asthma at 18 Years</b>                             | 19 ( 28.4)       | 69 ( 24.8)     | 0.66    |
| <b>Fecal Sample Transport Time in Days: mean (SD)</b> | 2.06 (1.47)      | 2.25 (1.95)    | 0.573   |
| <b>Smoked at Least 1 Cigarette: N(%)</b>              | 44 ( 65.7)       | 133 ( 47.8)    | 0.013   |
| <b>Completed DASS-21</b>                              | 67 (100.0)       | 277 ( 99.6)    | 1.000   |
| <b>Completed Microbiome Analysis</b>                  | 35 ( 52.2)       | 169 ( 60.8)    | 0.254   |
| <b>Completed Nutrition Stress Test</b>                | 55 ( 82.1)       | 228 ( 82.0)    | 1.000   |

Supplementary Figure S1: Correlation of continuous scales from ASRS and DASS-21 and baseline (fasting) GlycA and iAUC2h stratified by sex with BMI and asthma adjustments.

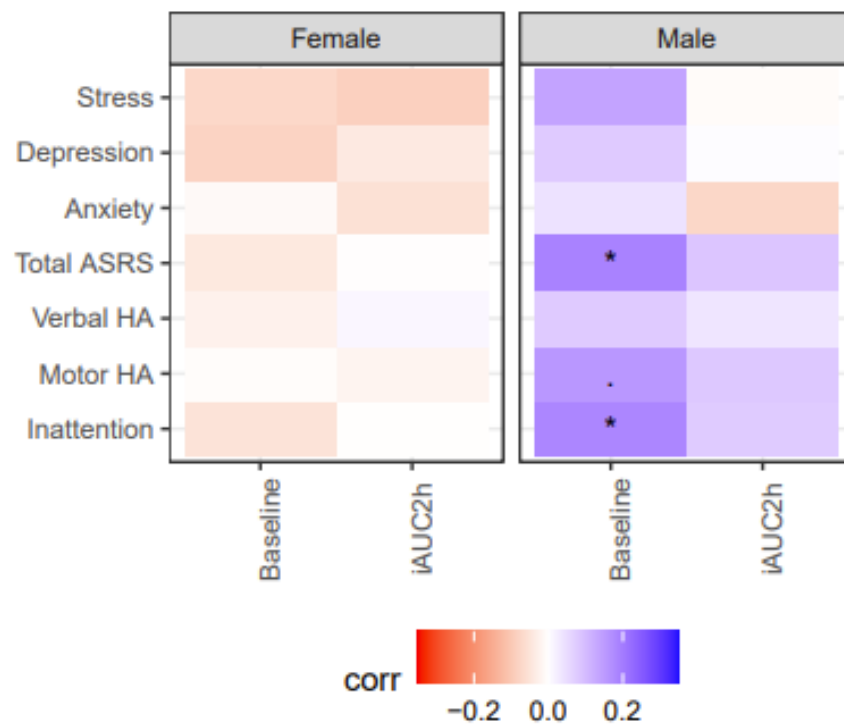

Abbreviations: Adult ADHD Self-Report Scale (ASRS), Verbal Hyperactivity/Impulsivity (Verbal HA), Motor Hyperactivity/Impulsivity (Motor HA), incremental area under the curve after 2 hours (iAUC2h).

.p<0.10, \*p<0.05, \*\*p<0.01

Supplementary Figure S2: Comparisons of the microbiome with categorical ASRS groups and continuous scales from ASRS and DASS with BMI adjustment.

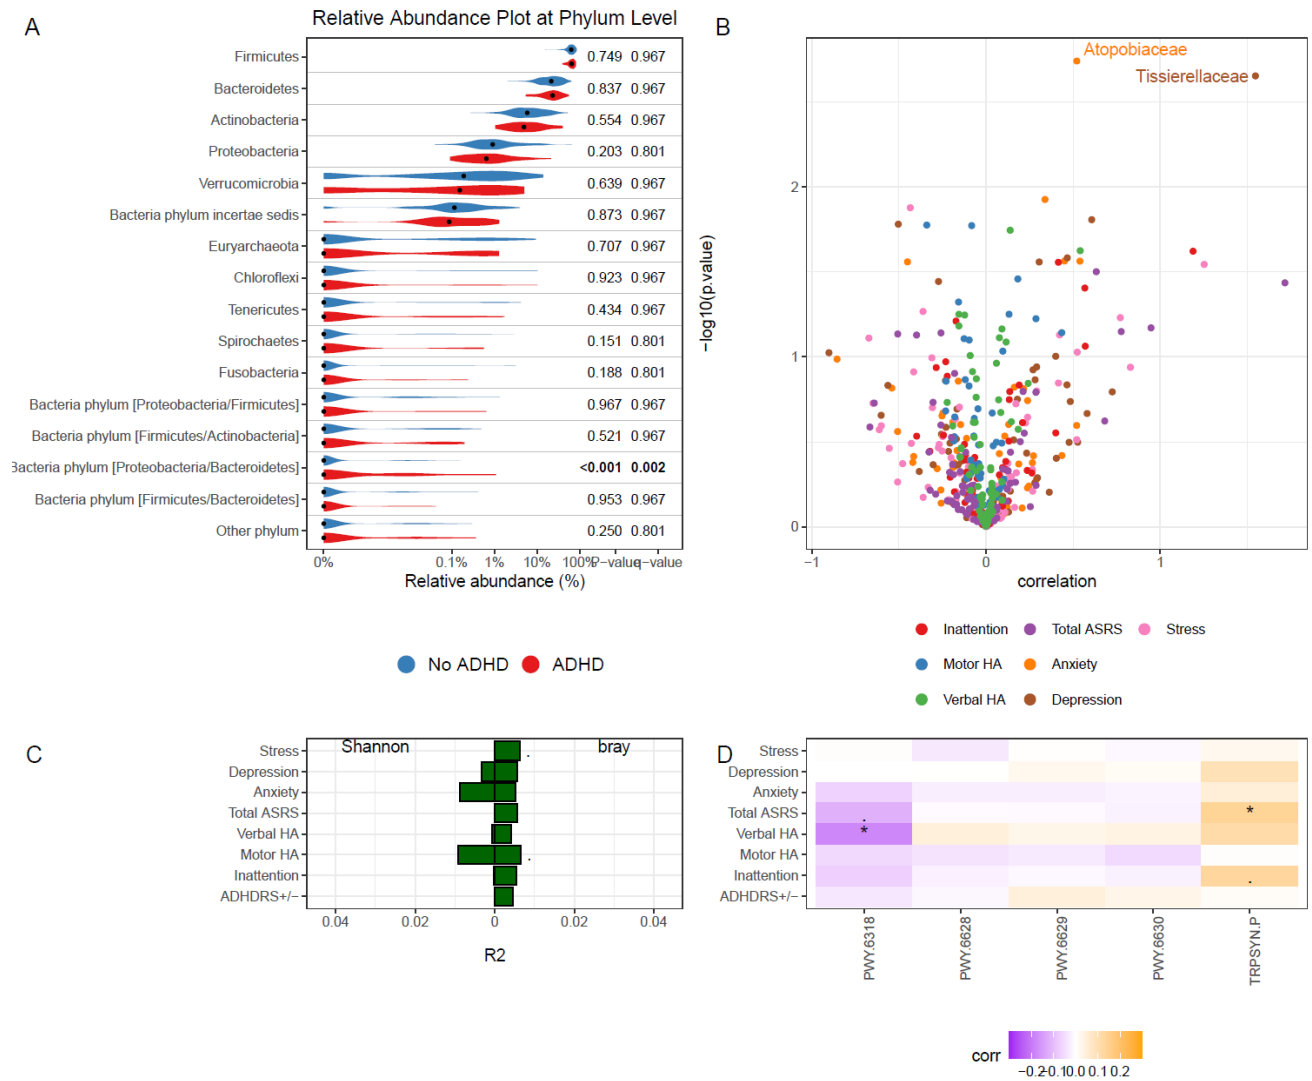

A: Relative abundance comparison of the dominating 15 phyla in ASRS+ (red) and ASRS- (blue) groups. B: Volcano plots of correlation analysis between continuous ASRS and DASS scales and relative abundance at the phylum level. C: Alpha diversity (Shannon) and beta diversity (Bray-Curtis) in relation to continuous ASRS, categorical ASRS groups, and DASS scales, represented in terms of R2 values. D: KEGG pathway abundance of tyrosine, phenylalanine, and tryptophan relevant pathways (precursors of serotonin) correlations with continuous ASRS scales, categorical ASRS groups, and DASS scales. Abbreviations: Adult ADHD Self-Report Scale (ASRS), Verbal Hyperactivity/Impulsivity (Verbal HA), Motor Hyperactivity/Impulsivity (Motor HA). . $p < 0.10$ , \* $p < 0.05$ , \*\* $p < 0.01$

Supplementary Figure S3: Relative abundance comparison of the dominating 15 families in ASRS+ (red) and ASRS- (blue) groups in females.

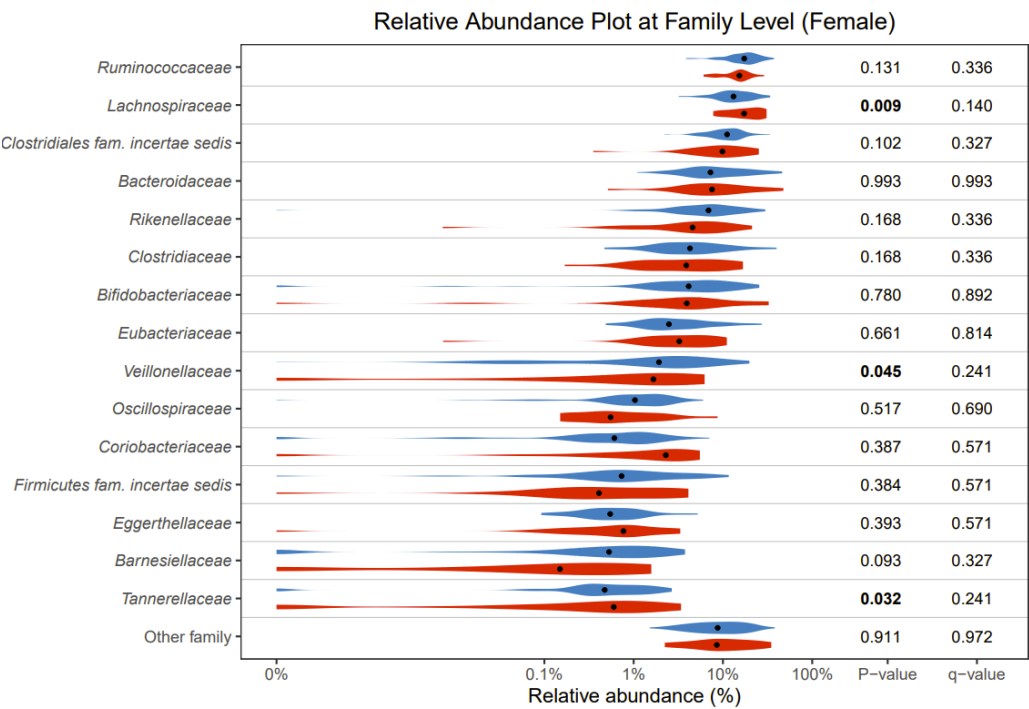

Supplementary Figure S4: Relative abundance comparison of the dominating 15 families in ASRS+ (red) and ASRS- (blue) groups in males.

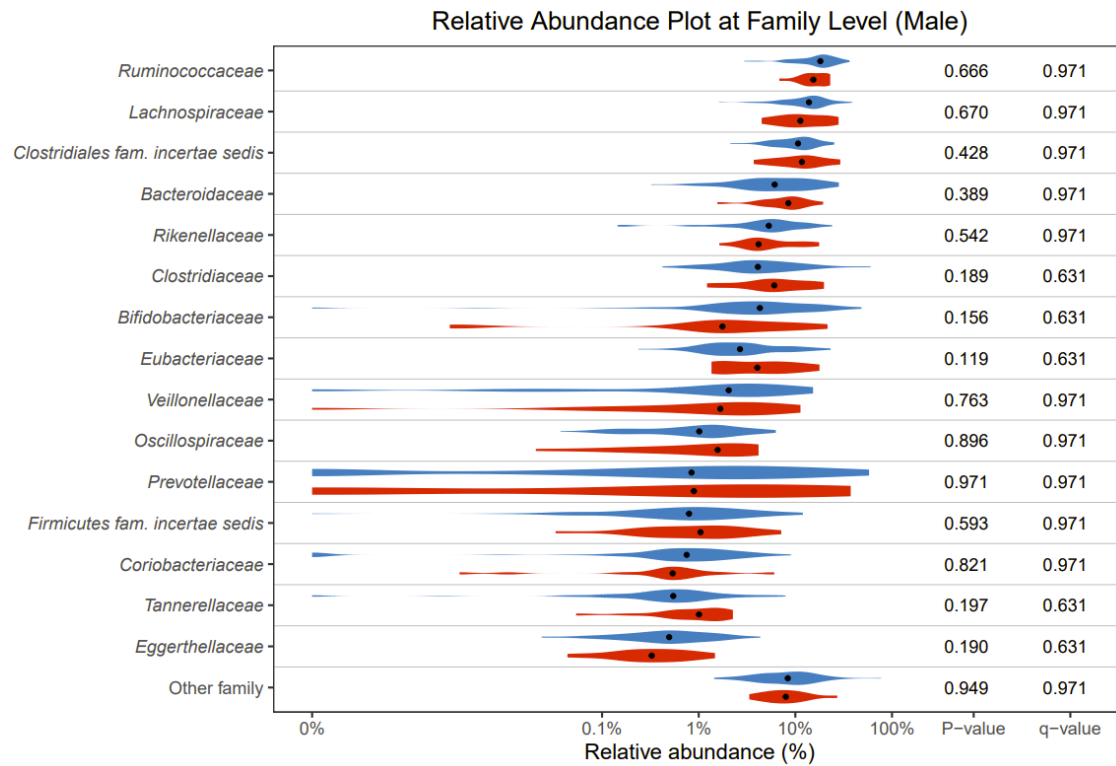

Supplementary Figure S5: Relative abundance comparison of the dominating 15 families in ASRS+ (red) and ASRS- (blue) groups overall.

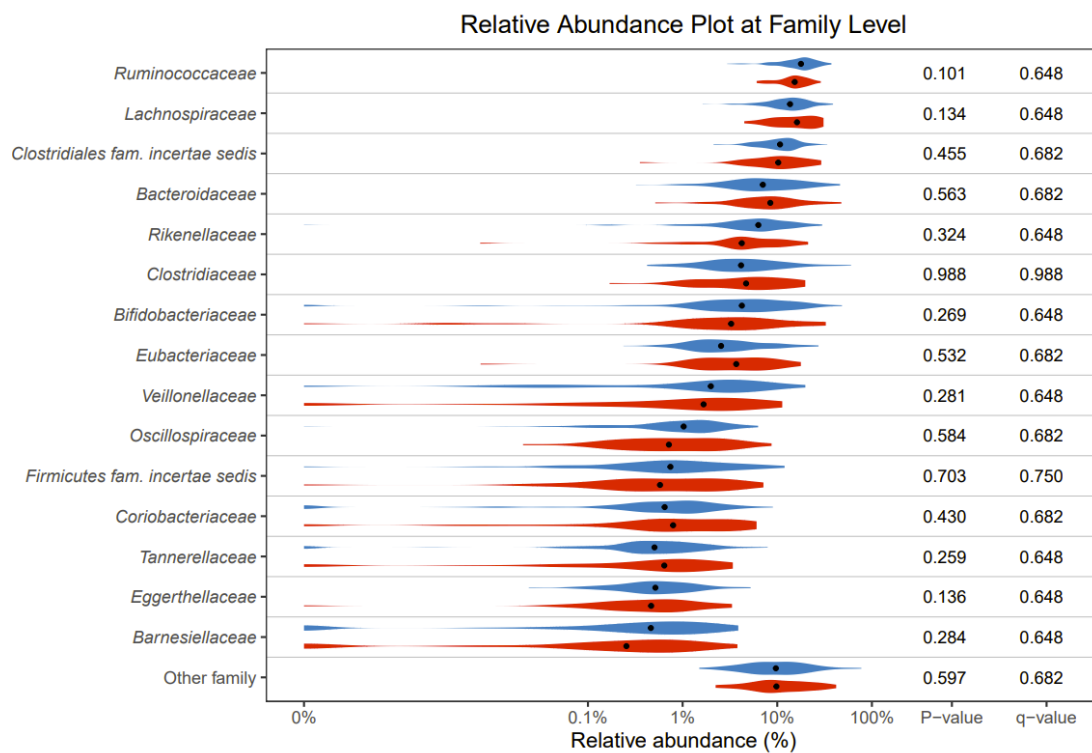

Supplement: MOESM1 [file 41598_2025_94687_MOESM1_ESM.pdf]
